# Supplementary material for: High-loading Ga-exchanged MFI zeolites as selective and coke-resistant catalysts for nonoxidative ethane dehydrogenation
Source: Royal Society of Chemistry journal article supplement (doi:10.1039/d1cy01799c), 2021-12-22
Supplement: d1cy01799c1.pdf [file d1cy01799c1.pdf]

Electronic Supplementary Information

**High-loading Ga-exchanged MFI zeolites as selective and coke-resistant catalysts for nonoxidative ethane dehydrogenation**

Mengwen Huang<sup>a</sup>, Shunsaku Yasumura<sup>a</sup>, Lingcong Li<sup>a</sup>, Takashi Toyao<sup>a,b</sup>, Zen Maeno<sup>\*,a</sup>, Ken-ichi Shimizu<sup>\*, a,b, ‡</sup>

<sup>a</sup> Institute for Catalysis, Hokkaido University, N-21, W-10, Sapporo 001-0021, Japan

<sup>b</sup> Elements Strategy Initiative for Catalysts and Batteries, Kyoto University, Katsura, Kyoto 615-8520, Japan

## EDH reactions

The conversion, selectivity, and carbon balance values were determined based on the following equations.

$$\text{Conv. [\%]} = \frac{[\text{ethane}]_{\text{init}} - [\text{ethane}]}{[\text{ethane}]_{\text{init}}} \times 100$$

$$\text{Selec. [\%]} = \frac{[\text{ethylene}]}{[\text{ethylene}] + [\text{methane}]} \times 100$$

$$\text{Carbon balance [\%]} = \frac{([\text{ethane}] + [\text{ethylene}] + [\text{methane}])}{[\text{ethane}]_{\text{init}}} \times 100$$

Note that the gas line from the reactor to GC was heated at 200 °C and that the amounts of other products, such as C4 and C6 hydrocarbons, are relatively low compared to ethylene and methane in all the case. The deactivation rate based on a first-order deactivation mechanism ( $k_d^{-1}$ ) was calculated according to the previous paper as follows:

$$k_d(h^{-1}) = \frac{\ln\left(\frac{1 - \text{Conv.}_{\text{end}}}{\text{Conv.}_{\text{end}}}\right) - \ln\left(\frac{1 - \text{Conv.}_{\text{start}}}{\text{Conv.}_{\text{start}}}\right)}{t}$$

where  $\text{Conv.}_{\text{start}}$  and  $\text{Conv.}_{\text{end}}$  denote the conversion at the start and the end, and  $t$  represents the reaction time in hours. Lower  $k_d$  values are indicative of slower deactivation. For the reuse experiment, the Ga-MFI-1.0(800) after 20 h reaction was treated with 10 mL/min of 5% O<sub>2</sub>/He at 600 °C for 90 min to calcine the coke and then treated with 10 mL/min of 10% H<sub>2</sub>/He to regenerate the Ga hydrides in MFI. The dehydrogenation was performed in the same reaction conditions for 20 h. The kinetic study was conducted in the following reaction conditions. For the formation rate dependency on  $p(\text{C}_2\text{H}_6)$ :  $p(\text{C}_2\text{H}_6) = 0.02\text{--}0.08$ , balanced with He (total flow rate: 50 mL/min), and 600 °C. For the formation rate dependency on reaction temperature:  $p(\text{C}_2\text{H}_6) = 0.04$ , balanced with He (total flow rate: 50 mL/min), and 550–610 °C.

## Figures

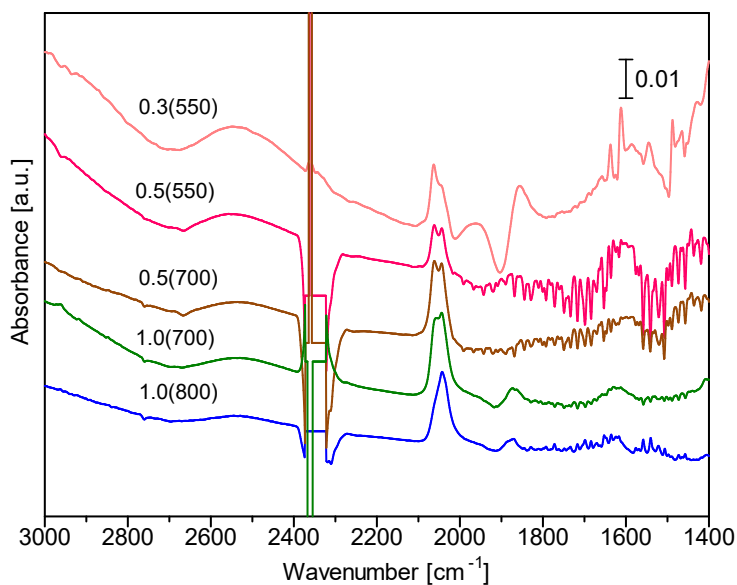

**Figure S1.** Wide-range difference IR spectra obtained at 50 °C without exposure to air. The IR spectra after H<sub>2</sub> treatment at different temperature was recorded at 50 °C and then the sample was further treated at 800 °C under He flow followed by cooling to 50 °C to record the spectra. The difference IR spectra were obtained by subtracting the spectra after He treatment from the ones after H<sub>2</sub> treatment.

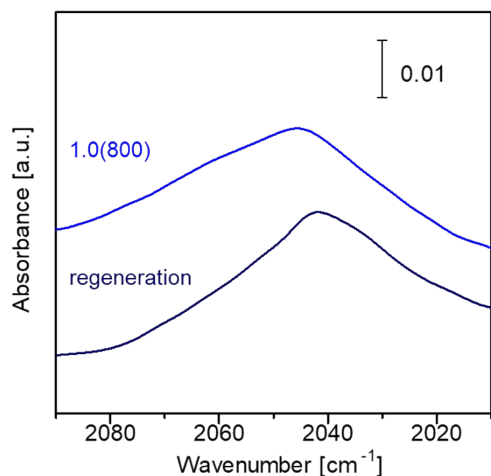

**Figure S2.** IR spectra of regenerated Ga-hydrides by H<sub>2</sub> treatment of the He-treated Ga-MFI-1.0(800). The difference spectrum was obtained in a similar manner.

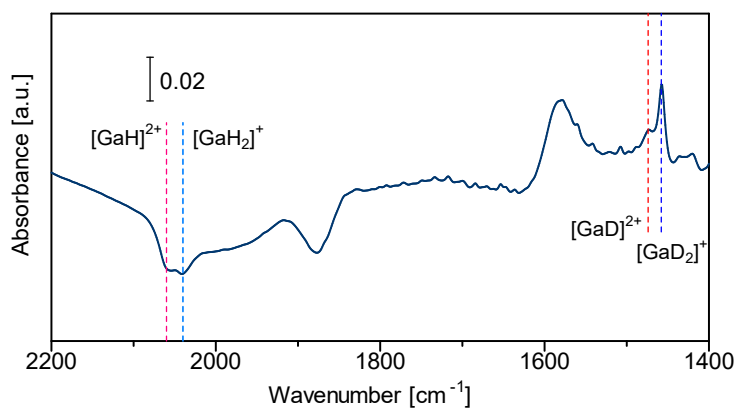

**Figure S3.** IR spectra for exchange reaction of Ga hydrides with D<sub>2</sub> at 300 °C. After the RSSIE reaction for Ga-MFI-1.0(800) (H<sub>2</sub>, 800 °C), the temperature decreased to 50 °C to take the background spectrum. Next, the sample was exposed to D<sub>2</sub> at 300 °C and then the temperature decreased to 50 °C again for measurement.

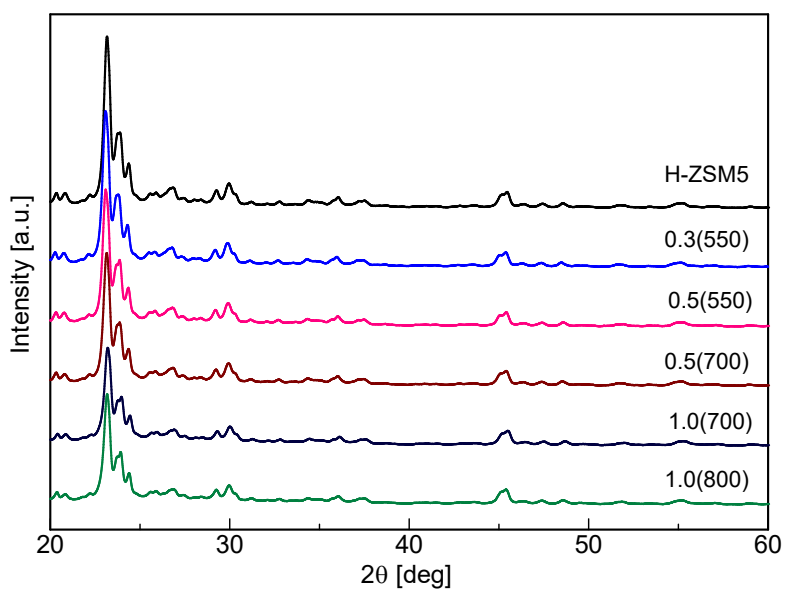

**Figure S4.** XRD patterns of a series of Ga-MFI after RSSIE. The XRD measurements were performed under room temperature and air atmosphere.

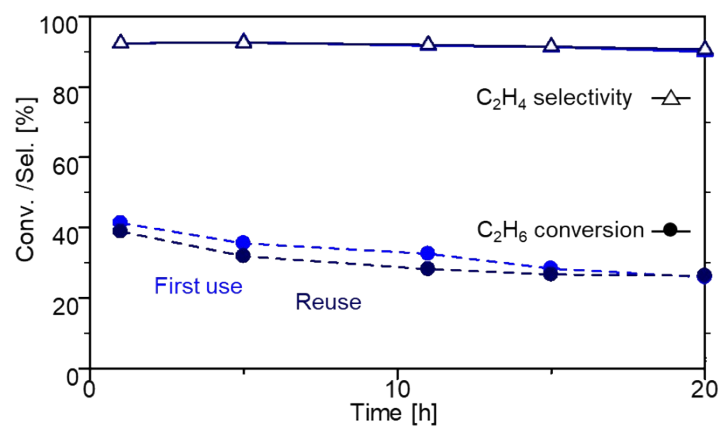

**Figure S5.** Time on stream of reuse experiment. Reaction conditions: 100 mg of Ga-MFI-1.0(800), 10% C<sub>2</sub>H<sub>6</sub>/He (10 mL/min), 660 °C. Regeneration treatment: (1) 5% O<sub>2</sub>/He (10 mL/min), 600 °C. (2) 10% H<sub>2</sub>/He (10 mL/min), 800 °C.

**Table S1.** Comparison of conversion, selectivity, and deactivation rate of Ga-MFI and previously reported Pt-free catalysts in C<sub>2</sub>H<sub>6</sub> dehydrogenation without oxidant.

| Catalyst                                          | Temp.<br>[°C] | Cat.<br>[mg] | Flow<br>[mL/min] | C <sub>2</sub> H <sub>6</sub><br>Conc.<br>[%] | C <sub>2</sub> H <sub>6</sub><br>Conv.<br>[%] | C <sub>2</sub> H <sub>4</sub><br>Sel.<br>[%] | C <sub>2</sub> H <sub>4</sub><br>Formation Rate<br>[mmol/(g·h)] | Deactivation<br>Rate ( <i>k<sub>d</sub></i> )<br>[h <sup>-1</sup> ] | Reference                                                            |
|---------------------------------------------------|---------------|--------------|------------------|-----------------------------------------------|-----------------------------------------------|----------------------------------------------|-----------------------------------------------------------------|---------------------------------------------------------------------|----------------------------------------------------------------------|
| Ga-MFI-1.0(800)                                   | 660           | 100          | 10               | 10                                            | 43.1                                          | 89.7                                         | 10.4                                                            | 0.024 (15 h)                                                        | This work                                                            |
|                                                   | 660           | 50           | 10               | 50                                            | 28.5                                          | 92.6                                         | 72.1                                                            | 0.014 (30 h)                                                        | This work                                                            |
| Ga-MFI-0.3(550)                                   | 660           | 100          | 10               | 10                                            | 79.1                                          | 55.0                                         | 11.7                                                            | 0.190 (15 h)                                                        | This work                                                            |
| In-CHA                                            | 700           | 100          | 7.5              | 13                                            | 37.4                                          | 95.1                                         | 9.2                                                             | 0.0025 (20 h)                                                       | <i>J. Am. Chem. Soc.</i> ,<br>2020, 142, 4820                        |
| Cr0.8MFI                                          | 650           | 100          | 10               | 10                                            | 36.2                                          | > 99                                         | 19.2                                                            | 0.0046 (40 h)                                                       | <i>ACS Cat.</i> , 2021, 11,<br>3988                                  |
| Fe-containing<br>MFI siliceous<br>zeolite         | 600           | 200          | 6.6              | 30                                            | 26.3                                          | 97.5                                         | 10.4                                                            | n.a.                                                                | <i>J. Am. Chem. Soc.</i> ,<br>2020, 142, 16429                       |
| 0.10Ba-Ga-α-<br>Al <sub>2</sub> O <sub>3</sub>    | 700           | 100          | 143              | 12.6                                          | 1                                             | 98                                           | 4.7                                                             | n.a.                                                                | <i>Appl. Catal. A<br/>General</i> , 2019, 581, 23                    |
| FeZSM5                                            | 600           | 100          | 60               | 9                                             | 28                                            | 71.6                                         | 29.0                                                            | 0.071 (4.5 h)                                                       | <i>Applied Catalysis B:<br/>Environmental</i> , 2019,<br>256, 117816 |
| Ga/SiO <sub>2</sub> -doped<br>TiO <sub>2</sub>    | 650           | 200          | 30               | 3                                             | 46.0                                          | 84.9                                         | 4.7                                                             | 0.81 (6 h)                                                          | <i>Fuel Process Tech.</i> ,<br>2018, 177, 246                        |
| 5Cr/MCM-41E                                       | 650           | 160          | 50               | 15                                            | 23                                            | 99                                           | 28.6                                                            | n.a.                                                                | <i>J. Mol. Cat. A Chem.</i> ,<br>2009, 301, 159                      |
| Cr/MgAlOx                                         | 700           | 500          | 70               | 29                                            | 15                                            | 84                                           | 13.5                                                            | n.a.                                                                | <i>Catal. Comm.</i> , 2007,<br>8, 2186                               |
| Cr/Al <sub>2</sub> O <sub>3</sub>                 | 580           | 200          | 22               | 9                                             | 27                                            | 94                                           | 6.8                                                             | 0.676 (1 h)                                                         | <i>Catal. Lett.</i> , 2005, 103,<br>143                              |
| Co-MFI                                            | 650           | 200          | 30               | 3                                             | 54.5                                          | 87.8                                         | 5.8                                                             | 0.078 (6 h)                                                         | <i>Microporous<br/>Mesoporous Mater.</i> ,<br>2021, 312, 110791      |
| Ni <sub>3</sub> Ga/Al <sub>2</sub> O <sub>3</sub> | 600           | 100          | 20               | 10                                            | 10.0                                          | 94.0                                         | 5.0                                                             | 0.018 (30 h)                                                        | <i>ACS Catal.</i> , 2019, 9,<br>10464                                |
| Pd-In-0.8/SiO <sub>2</sub>                        | 600           | 200          | 50               | 5                                             | 24.0                                          | >99                                          | 8.0                                                             | 0.090 (3 h)                                                         | <i>Catal. Sci. Tech.</i> ,<br>2016, 6, 6965                          |
